# Supplementary material for: Enhanced Materials from Nature: Nanocellulose from Citrus Waste
Source: PubMed Central journal article supplement (PMC6272572; doi:10.3390/molecules20045908), 2015-04-03
Supplement: molecules-20-05908-s001.pdf [file molecules-20-05908-s001.pdf]

## Supplementary Materials

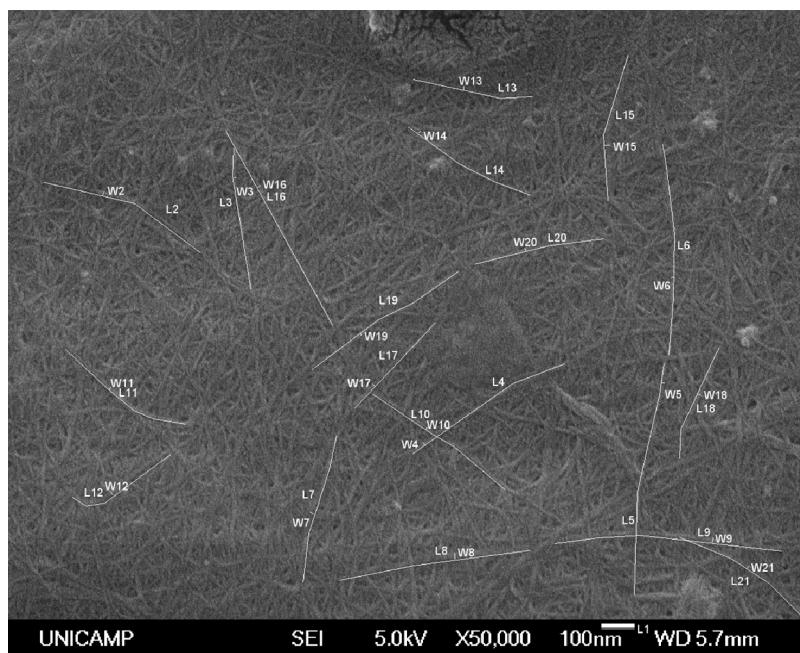

**Figure S1.** Field emission scanning electron micrographs with 20 segments randomly selected for length (L) and width (W) nanofibers determination using ImageJ 1.49o software

**Table S1.** Width (W) and length (L) measurements of 20 segments aforementioned and the calculation of their aspect ratio. The length highlighted in orange is performed on the calibration from the bar scale of the micrograph.

| Segment            | Length (nm) | Width (nm) | Aspect Ratio |
|--------------------|-------------|------------|--------------|
| 1                  | 100.000     |            |              |
| 2                  | 533.769     | 11.820     | 45.16        |
| 3                  | 433.422     | 5.805      | 74.66        |
| 4                  | 541.493     | 11.556     | 46.86        |
| 5                  | 710.628     | 9.615      | 73.91        |
| 6                  | 641.515     | 8.333      | 76.98        |
| 7                  | 457.462     | 9.465      | 48.33        |
| 8                  | 584.243     | 17.994     | 32.47        |
| 9                  | 696.349     | 13.598     | 51.21        |
| 10                 | 498.519     | 6.346      | 78.56        |
| 11                 | 442.774     | 8.209      | 53.94        |
| 12                 | 357.139     | 15.129     | 23.61        |
| 13                 | 369.831     | 9.615      | 38.46        |
| 14                 | 429.830     | 6.047      | 71.08        |
| 15                 | 454.102     | 15.398     | 29.49        |
| 16                 | 676.541     | 8.905      | 75.97        |
| 17                 | 357.760     | 8.719      | 41.03        |
| 18                 | 360.400     | 11.029     | 32.68        |
| 19                 | 538.190     | 8.333      | 64.59        |
| 20                 | 400.408     | 10.746     | 37.26        |
| 21                 | 459.058     | 10.435     | 43.99        |
| Average            | 458.260     | 9.615      | 47.60        |
| Standard Deviation | 114.842     | 3.212      | 18.01        |
